# Supplementary material for: Amorphous silica nanoparticles induce tumorigenesis via regulating ATP5H/SOD1-related oxidative stress, oxidative phosphorylation and EIF4G2/PABPC1-associated translational initiation
Source: PeerJ. 2019 Mar 4;7:e6455. doi: 10.7717/peerj.6455 (PMC6404658; doi:10.7717/peerj.6455)
Supplement: Supplemental Information 8 [file peerj-07-6455-s008.xlsx]

## Sheet: Down
gene	logFC	AveExpr	t	P.Value
SNORD41	-8.4966	5.83848	169.527	8.74e-13
MIR548AI	-4.43723	3.36544	70.098	2.29e-10
SCARNA9	-5.72823	4.23495	55.3841	1.01e-09
RNU5E-1	-5.57315	5.59297	54.5807	1.11e-09
SNORD13	-8.21343	7.76124	52.8144	1.36e-09
SNORD116-17	-5.45038	5.31078	52.1574	1.48e-09
SNORD105B	-5.57714	7.19595	45.2651	3.6e-09
SNORD116-24	-6.01086	4.47487	43.5196	4.62e-09
SNORD116-18	-5.42084	5.32388	43.1057	4.9e-09
MIR548AJ2	-2.38196	2.38016	40.1867	7.62e-09
LINC00493	-3.54608	4.05262	40.0306	7.81e-09
SNORD63	-6.28636	5.10154	39.9004	7.97e-09
HIST1H1E	-3.31925	8.34294	38.2188	1.04e-08
FKSG52	-3.10937	4.37075	37.3306	1.21e-08
SNORA23	-5.87392	6.80394	36.5101	1.39e-08
SNORD82	-6.50841	5.30958	35.4236	1.68e-08
SNORA22	-6.80826	5.91938	35.1737	1.76e-08
SNORA48	-7.38154	6.33736	33.587	2.35e-08
HIST1H2BK	-4.5658	6.12636	33.2133	2.52e-08
MIR548D1	-4.78891	3.92842	32.5812	2.85e-08
PXMP2	-2.12349	5.22282	32.3119	3e-08
RMRP	-6.21189	7.89791	31.4401	3.56e-08
MIR548AD	-4.80561	3.87545	31.0928	3.82e-08
MTRNR2L2	-3.01787	3.85043	30.9614	3.92e-08
HIST2H2AC	-3.85587	7.03146	30.8683	4e-08
PRDX5	-2.82188	5.782	30.6639	4.17e-08
SNORA71A	-5.47094	6.20948	30.4103	4.39e-08
CKS2	-3.29187	5.38034	30.2538	4.53e-08
SNORD71	-6.06222	6.429	30.1419	4.64e-08
SNORD3C	-4.93218	6.77123	29.6776	5.12e-08
SNORD46	-3.22306	8.31086	28.9112	6.03e-08
PHF5A	-2.06581	4.03661	28.7453	6.25e-08
SCARNA9L	-4.35988	3.76568	27.8852	7.56e-08
ELOF1	-2.21681	5.3205	27.5305	8.19e-08
SNORD116-15	-6.17957	5.25072	26.8903	9.49e-08
ATP5EP2	-3.37518	3.86751	25.8654	1.21e-07
SNORA71C	-4.585	6.50866	25.378	1.36e-07
HIST1H2BF	-2.27844	5.34746	25.1428	1.45e-07
MIR622	-3.57993	4.99647	24.9906	1.5e-07
MIR4461	-4.60134	4.42889	24.7903	1.58e-07
EEF1DP1	-2.47074	6.56661	24.6925	1.62e-07
SNORD116-14	-5.4951	4.10001	24.6356	1.64e-07
SNORA20	-5.64795	4.29661	24.3391	1.77e-07
SNORA50	-5.88321	5.02256	24.322	1.78e-07
HIST1H4C	-4.16646	5.79707	24.1073	1.88e-07
SNORD61	-5.64444	4.46926	23.7537	2.06e-07
SNORD116-3	-4.98879	4.31662	23.541	2.18e-07
SNORD116-9	-4.98879	4.31662	23.541	2.18e-07
SNORD116-23	-4.79223	4.3953	23.4599	2.23e-07
SNORA68	-6.00839	6.09334	23.1597	2.42e-07
RNASEH2A	-3.26364	5.69932	22.6852	2.75e-07
SNORD104	-5.08203	7.02557	22.6182	2.8e-07
SNORA49	-5.64553	5.30689	22.5343	2.87e-07
HIST2H2AA4	-4.75441	6.41416	22.0006	3.33e-07
MIR548G	-2.06434	2.25488	21.8485	3.48e-07
MIR4472-2	-2.01977	4.4665	21.8312	3.49e-07
RPS15A	-3.81288	5.9631	21.6309	3.7e-07
SNORD10	-3.16795	6.60027	21.0945	4.33e-07
UBE2C	-2.11617	4.88116	20.9616	4.5e-07
POLR2K	-3.55975	3.76488	20.9444	4.52e-07
SNORA12	-5.47204	4.67474	20.6119	5e-07
ENO1	-2.06292	6.07764	20.4863	5.19e-07
SNORA37	-4.69865	5.26276	19.9582	6.11e-07
SNORD3D	-4.29345	7.13086	19.9044	6.21e-07
SNORD116-20	-3.98617	4.43732	19.8099	6.4e-07
IFITM3	-2.93671	5.94752	19.5942	6.85e-07
SNORD116-8	-4.61066	4.35059	19.4701	7.12e-07
LGALS1	-2.85771	7.26203	19.3665	7.37e-07
RNU105A	-4.47646	8.1771	18.6479	9.32e-07
RPL41P2	-5.75723	6.83473	18.5723	9.55e-07
SNORD12B	-5.28948	4.23605	18.4094	1.01e-06
SNORA59B	-4.90142	4.73191	18.3182	1.04e-06
SNORD12C	-4.59685	3.62617	18.2319	1.07e-06
SNORD70	-4.18755	4.57069	18.1985	1.08e-06
SNORD3B-1	-4.40048	6.86433	18.1162	1.11e-06
SNORD3B-2	-4.40048	6.86433	18.1162	1.11e-06
MIR4521	-4.19726	3.54386	18.0967	1.12e-06
TECRP1	-2.09065	6.11975	17.9945	1.16e-06
SNORD3A	-4.47539	7.06527	17.7025	1.29e-06
RPL26	-3.9625	6.2686	17.6567	1.31e-06
DDA1	-2.35189	5.14678	17.5131	1.38e-06
RPL24	-2.32168	5.10207	17.435	1.41e-06
SNORD4B	-3.80331	3.57741	17.2635	1.5e-06
SNORA21	-4.97457	5.98559	17.1439	1.57e-06
AJUBA	-3.25504	4.42378	17.07	1.61e-06
CNN2	-2.18916	5.56312	16.5572	1.95e-06
COX7B	-2.78037	3.99357	16.4849	2e-06
BABAM1	-2.43677	5.36116	16.3385	2.11e-06
SFN	-2.06354	6.48684	16.0378	2.37e-06
SNORD116-25	-2.68237	2.74477	16.0353	2.37e-06
HIST1H4E	-3.90022	5.31076	15.8998	2.5e-06
SNORD111	-4.9542	3.83336	15.8169	2.58e-06
SNORD15B	-3.49097	6.24968	15.741	2.66e-06
SNORD116-2	-4.20896	3.94477	15.6442	2.76e-06
SNORD78	-4.80902	4.78528	15.5763	2.84e-06
HIST1H3F	-4.08429	6.66219	15.5739	2.84e-06
TK1	-2.026	6.55277	15.5144	2.91e-06
KRT18	-3.01048	6.37405	15.4925	2.94e-06
HIST1H1C	-3.36558	5.03979	15.3545	3.1e-06
HIST1H3B	-4.5489	5.01877	15.3006	3.17e-06
HIST1H2AB	-4.21044	5.75433	15.183	3.32e-06
HIST2H2AB	-4.34717	5.17288	15.0998	3.44e-06
SNORD116-1	-3.04343	2.90297	14.9415	3.67e-06
RPS5	-2.5944	7.64527	14.8534	3.81e-06
SNORD73A	-2.14504	5.19107	14.804	3.88e-06
OAZ1	-3.31663	6.59115	14.6089	4.21e-06
SCARNA22	-3.38266	5.5768	14.6024	4.23e-06
SNORD60	-3.83242	5.91377	14.5347	4.35e-06
SNORD91B	-4.96726	4.8661	14.5271	4.36e-06
SNORD59B	-3.3646	3.8454	14.4311	4.54e-06
SNORA24	-3.38972	6.55847	14.4287	4.55e-06
SNORD58B	-3.49663	5.71477	14.3037	4.8e-06
SNORD14A	-3.33951	4.73085	14.2309	4.95e-06
RPS29	-2.03953	5.59664	14.1364	5.16e-06
SNORA13	-3.79942	4.84857	14.0893	5.27e-06
SLC7A5	-2.01969	5.8691	14.0714	5.31e-06
SNORD51	-3.02691	4.09545	14.0668	5.32e-06
SNORD116-5	-4.18866	3.53219	14.0619	5.33e-06
SNORD116-7	-4.18866	3.53219	14.0619	5.33e-06
NQO1	-2.41263	4.78754	14.043	5.37e-06
HIST1H4B	-2.54598	3.82511	14.0008	5.47e-06
HSPA1B	-2.57659	4.66222	13.8796	5.77e-06
HIST1H4D	-3.94125	5.59791	13.8164	5.94e-06
PSENEN	-2.2575	5.68366	13.8084	5.96e-06
POLR2L	-2.26839	4.66485	13.7971	5.99e-06
SNORD119	-4.41653	3.47691	13.7513	6.11e-06
EMP3	-3.85472	7.37696	13.7431	6.13e-06
SCARNA7	-3.27203	4.97302	13.6786	6.31e-06
CCL2	-3.91585	4.65441	13.6645	6.35e-06
RPS2P7	-2.35497	7.70339	13.5897	6.57e-06
HIST1H2AM	-2.21067	3.69541	13.5243	6.77e-06
SNORA54	-3.72447	4.51435	13.4671	6.95e-06
CHMP5	-2.03668	4.05958	13.4457	7.01e-06
SNORD116-27	-3.35581	3.01636	13.3154	7.44e-06
SNORD14B	-3.75204	4.92777	13.1981	7.86e-06
SNORD15A	-3.49439	4.59827	13.1445	8.06e-06
SNORA70D	-2.34433	4.38051	13.0922	8.25e-06
SCARNA5	-3.39559	5.01698	13.0378	8.47e-06
SNORD9	-3.35831	4.99928	13.0121	8.57e-06
IFITM2	-3.50418	5.81253	13.0031	8.61e-06
RNU5A-1	-2.43457	6.37089	12.9292	8.91e-06
ICT1	-2.3823	5.39335	12.6391	1.02e-05
RPL13AP20	-2.95229	6.49784	12.5203	1.08e-05
VTRNA2-1	-3.54118	4.54343	12.5026	1.09e-05
PLP2	-2.02731	5.72491	12.4379	1.13e-05
PSMB3	-3.33109	5.90074	12.3875	1.16e-05
SNORA34	-4.64221	5.23063	12.3849	1.16e-05
DKK1	-2.25274	3.97266	12.3849	1.16e-05
SCARNA1	-2.73362	3.09008	12.2753	1.22e-05
SNORD8	-2.59065	5.75795	12.1968	1.27e-05
FTL	-3.71349	6.67026	12.1044	1.33e-05
SNORD37	-3.76656	3.9114	12.098	1.34e-05
TMEM256	-2.10974	5.50487	12.082	1.35e-05
NDUFS5	-2.13008	5.97468	11.992	1.41e-05
TALDO1	-2.17621	5.5447	11.9054	1.47e-05
PLK1	-2.11068	5.9236	11.8336	1.53e-05
DHCR7	-2.6505	5.35689	11.6785	1.66e-05
SNORD116-26	-2.04686	2.46818	11.6652	1.67e-05
MIR1307	-2.08615	4.70946	11.6258	1.7e-05
LOXL1	-2.30794	5.41235	11.5893	1.73e-05
HIST1H2AE	-3.0899	6.16254	11.5638	1.76e-05
MYL12A	-3.24456	4.67168	11.3851	1.93e-05
SNORD126	-3.6154	3.34477	11.311	2.01e-05
SNORD116-16	-3.19794	2.65473	11.3099	2.01e-05
UQCR10	-2.98627	4.33184	11.2124	2.12e-05
RPS3AP47	-2.8156	4.71858	11.1461	2.2e-05
SCARNA12	-3.46989	6.61376	11.1227	2.22e-05
MIR548D2	-2.59921	3.12678	11.1117	2.24e-05
SNORA71B	-3.04979	4.75304	11.0607	2.3e-05
MRPS7	-2.3631	4.92654	11.0549	2.31e-05
RNU5A-8P	-3.35279	3.9231	11.0426	2.32e-05
SNORD90	-2.83036	3.46319	11.0257	2.34e-05
SNORA31	-3.52761	5.27113	10.9705	2.42e-05
LDLR	-2.23582	5.07027	10.8616	2.57e-05
SNORA71D	-2.95088	6.66568	10.8494	2.58e-05
ANXA6	-2.42522	5.5227	10.7801	2.69e-05
MED11	-2.11759	3.45282	10.7077	2.8e-05
CENPW	-2.09484	3.89274	10.7058	2.8e-05
QARS	-2.06205	5.18433	10.6325	2.92e-05
SDC4	-3.72478	5.18483	10.4802	3.18e-05
DPM1	-2.67212	4.48753	10.469	3.2e-05
RPS13	-2.63502	5.45039	10.3378	3.45e-05
B2M	-3.97297	5.38014	10.2548	3.63e-05
HIST1H2BI	-3.65358	5.34617	10.2197	3.7e-05
PLK2	-2.13329	3.51433	10.2154	3.71e-05
HIST1H3J	-	7.02847	10.2032	3.74e-05
	2.41579
SNORA45	-3.47739	4.36341	10.1961	3.75e-05
SNORD58C	-3.82558	4.20816	10.1812	3.79e-05
VTRNA1-3	-3.91689	4.56949	10.1645	3.82e-05
TMEM14C	-2.07061	4.88672	10.1304	3.9e-05
COX6B1	-2.28582	4.98383	10.0601	4.07e-05
NOP10	-2.9252	5.17016	10.0395	4.12e-05
RNY3P6	-2.01392	3.27618	9.94843	4.35e-05
IFI6	-3.91326	6.03673	9.88473	4.52e-05
SNORA76	-3.25137	4.71569	9.80935	4.73e-05
SNORA53	-2.58295	3.20418	9.77902	4.82e-05
RPS4Y1	-2.27369	3.84952	9.68851	5.09e-05
NDUFA1	-2.07785	4.22372	9.65854	5.19e-05
SNORD59A	-2.72386	5.20645	9.5702	5.48e-05
HIST1H3D	-3.0648	3.66453	9.53543	5.6e-05
NIPSNAP3A	-2.09747	3.13052	9.52373	5.64e-05
SUPT4H1	-2.16844	5.18822	9.37583	6.19e-05
RNU5D-1	-3.37308	4.28376	9.25615	6.68e-05
TGFBI	-2.20263	4.99889	9.23546	6.77e-05
ANXA2	-3.31059	6.17792	9.18249	7e-05
SLC38A2	-2.1096	3.96701	9.13761	7.21e-05
SNORA47	-2.43664	5.72939	9.01608	7.8e-05
TMBIM4	-2.14848	3.11166	9.01559	7.81e-05
ATP5H	-	6.24895	8.96543	8.07e-05
	4.24805
FAM127B	-2.0118	4.55274	8.8583	8.66e-05
SNORD1A	-2.04984	2.82262	8.85338	8.69e-05
FTLP3	-2.72065	7.75394	8.82724	8.84e-05
HIST1H3A	-3.49809	4.75993	8.82399	8.86e-05
COX8A	-2.99992	7.31603	8.80066	9e-05
SNORD121A	-2.48234	2.87501	8.73264	9.42e-05
ATP6V0E1	-2.57868	5.4773	8.64015	0.0001
SOD1	-2.282	5.56037	8.61661	0.000102
MIR5095	-2.38348	5.63707	8.59962	0.000103
RNU5E-2P	-2.19834	4.63657	8.59118	0.000104
THBS1	-2.49309	4.3926	8.54032	0.000107
TMSB4XP8	-3.4259	5.6294	8.45078	0.000114
SNORA5A	-3.23351	4.62436	8.40661	0.000118
SRGN	-3.71462	4.62173	8.3836	0.00012
SCARNA8	-2.47735	3.08568	8.36975	0.000121
ACTG1	-3.17301	8.78615	8.26262	0.00013
GANAB	-2.27741	5.1159	8.26217	0.00013
PDLIM1	-2.8189	4.83964	8.20096	0.000136
ACAT2	-2.77883	4.73886	8.19988	0.000136
SNORD85	-2.43455	2.60987	8.11173	0.000145
SNORA74A	-2.67486	4.1939	8.05326	0.000151
TPGS2	-2.41283	5.02906	8.01466	0.000156
SNORD12	-3.01976	5.36395	7.9402	0.000164
SNORD17	-2.9224	4.99788	7.93967	0.000164
SCARNA4	-3.09519	3.46184	7.90179	0.000169
SNORA52	-2.0224	6.08462	7.75528	0.000188
OSTC	-2.10143	3.80185	7.6643	0.000202
RNU12	-2.39998	4.4259	7.56616	0.000217
SCARNA23	-2.71646	2.83141	7.53643	0.000222
SNORA10	-2.27832	4.63991	7.46326	0.000235
MT2A	-2.51647	7.65283	7.45223	0.000237
HIST1H4L	-2.24456	4.61095	7.36437	0.000254
TMEM14A	-2.58283	3.54358	7.35145	0.000256
SNORA84	-2.06596	4.70636	7.34305	0.000258
SLIRP	-2.80472	4.07834	7.27825	0.000271
HIST1H2BO	-2.102	6.68564	7.25153	0.000277
ANXA2P2	-3.20229	6.80376	7.22529	0.000283
SCARNA6	-2.37927	4.65744	7.21435	0.000285
SCARNA18	-2.28523	2.98298	7.1822	0.000293
RPL41	-2.05414	5.12108	7.17283	0.000295
SNORA38	-2.78892	3.50662	7.12426	0.000307
FN1	-2.72183	4.25172	7.09088	0.000315
SNORA2A	-2.55415	2.99312	7.02206	0.000333
PSAP	-2.63827	5.61176	6.99196	0.000341
RRP36	-2.24299	4.18325	6.83659	0.000387
HIST1H2BB	-2.24202	3.3072	6.709	0.000431
XRCC6	-2.169	4.15886	6.68781	0.000438
COX6A1	-2.6168	6.49918	6.60607	0.00047
RPS28	-2.25219	6.72391	6.49808	0.000515
NSA2	-2.07524	3.66403	6.35387	0.000584
AXL	-2.1455	5.61227	6.22603	0.000653
TRAM2	-2.30982	4.18992	6.22299	0.000655
KPNA2	-2.67386	4.64291	6.21697	0.000659
MXRA7	-2.05428	5.47938	6.16297	0.000691
COX6A1P2	-2.33583	6.12693	5.89927	0.000879
SNORD1B	-2.43915	2.45855	5.80086	0.000963
SNORD58A	-2.62246	5.81029	5.77222	0.000989
APEX1	-2.4503	5.39891	5.71549	0.001043
RPS15	-2.02769	6.77474	5.66405	0.001096
TXN	-2.00924	4.42714	5.55674	0.001214
RNU5D-2P	-2.0948	6.80571	5.49358	0.001291
VTRNA1-1	-2.08208	2.91663	5.48613	0.0013
RNU6ATAC	-2.60952	4.87821	5.45462	0.001341
SNORD83A	-2.06172	3.84044	5.41889	0.001389
SNORA11	-2.27622	5.16899	5.07986	0.001952
DHCR24	-2.02963	6.19714	5.02006	0.002076
NGRN	-2.46555	3.96531	4.77076	0.002698
SNORD117	-2.04451	6.90159	4.71629	0.002861
PTPLAD1	-2.30194	3.44904	4.60767	0.003218
TMEM50A	-2.46225	4.54183	4.42477	0.003939
EEF2	-2.02113	8.67612	4.3556	0.004257

## Sheet: Up
gene	logFC	t	P.Value
UBE2Q1	2.0891	-31.2348	3.71e-08
MIR4296	2.20099	-30.591	4.23e-08
MIR4288	2.23615	-28.8596	6.09e-08
EIF4G2	3.31265	-27.5523	8.15e-08
DUSP23	2.31578	-25.8878	1.2e-07
MIR4746	2.09338	-24.5259	1.69e-07
MIR4533	2.10451	-23.1143	2.45e-07
MIR1233-1	2.34068	-23.0122	2.51e-07
MIR1233-2	2.34068	-23.0122	2.51e-07
MIR933	2.4352	-22.0724	3.26e-07
MIR1470	2.4536	-21.9397	3.39e-07
MIR3194	2.8511	-21.1471	4.26e-07
MIR1910	2.0733	-20.739	4.81e-07
MIR4523	2.54235	-20.0301	5.97e-07
MIR4740	2.28273	-19.8748	6.27e-07
MIR711	2.00008	-19.4249	7.23e-07
MIR3663	2.12531	-17.6159	1.33e-06
MIR3155B	2.31895	-17.3477	1.46e-06
MIR4516	2.23207	-17.2739	1.5e-06
MIR572	2.18986	-16.3672	2.09e-06
PABPC1	2.40438	-16.2854	2.16e-06
MIR4417	2.05711	-16.1467	2.27e-06
IGLJ7	2.77555	-15.8226	2.58e-06
MIR1973	6.03372	-15.8222	2.58e-06
MIR4522	2.22963	-15.1818	3.33e-06
MIR1237	2.32349	-14.1184	5.2e-06
MIR3622A	2.09992	-13.6703	6.34e-06
MIR1471	2.12381	-13.4373	7.04e-06
SNAR-D	2.18414	-13.3131	7.45e-06
HIST3H3	2.0146	-13.1139	8.17e-06
SNAR-C3	2.20889	-13.0586	8.39e-06
SNAR-C4	2.20099	-12.9139	8.98e-06
SNAR-B2	2.09888	-11.9884	1.41e-05
SNAR-G2	2.38042	-11.6129	1.71e-05
IGHD2-21	2.78022	-11.387	1.93e-05
SNAR-C2	2.1126	-11.0698	2.29e-05
MIR3648	2.18912	-10.9977	2.38e-05
MIR4674	2.06493	-10.6964	2.81e-05
GATAD2B	2.40958	-10.1168	3.93e-05
MIR1976	2.04403	-9.14992	7.15e-05
MIR4634	2.10172	-8.79577	9.03e-05
MIR4734	2.06796	-8.18843	0.000137376
MIR661	2.06985	-7.95959	0.000162011
