# Supplementary material for: Amorphous silica nanoparticles induce tumorigenesis via regulating ATP5H/SOD1-related oxidative stress, oxidative phosphorylation and EIF4G2/PABPC1-associated translational initiation
Source: PeerJ. 2019 Mar 4;7:e6455. doi: 10.7717/peerj.6455 (PMC6404658; doi:10.7717/peerj.6455)
Supplement: Supplemental Information 9 [file peerj-07-6455-s009.xlsx]

## Sheet: Sheet1
node1	node2
RPS13	RPL26
RPL24	RPS15A
RPL26	RPS5
RPS28	RPS29
RPS15	RPS5
RPS28	RPS4Y1
RPS15	RPS15A
RPS15A	RPL26
RPL24	RPS5
RPS28	RPS13
RPS15	RPL24
RPS15	RPS4Y1
RPS13	RPS5
RPS13	RPL24
RPS13	RPS29
RPS29	RPS4Y1
RPS13	RPS15A
RPS4Y1	RPS5
RPS29	RPL26
RPS15A	MRPS7
RPS13	RPS4Y1
RPS15	RPS13
RPS15A	RPS5
RPS15	RPL26
RPS15A	RPS4Y1
RPL24	RPL26
EEF2	RPS5
POLR2K	POLR2L
RPS28	RPL24
RPS28	RPS15
RPS29	RPS5
RPS28	RPS15A
RPS29	RPS15A
RPS28	RPS5
RPS15	RPS29
RPS29	MRPS7
HIST1H2BB	HIST1H2AB
RPL26	RPS4Y1
RPS15	MRPS7
HIST1H2BO	HIST1H2AB
HIST1H2BK	HIST1H2AB
NDUFS5	NDUFA1
RPS29	RPL24
HIST1H2BB	HIST1H2BO
RPS28	RPL26
RPL24	RPS4Y1
HIST2H2AC	HIST1H2BO
RPS15A	EEF2
HIST1H2BB	HIST2H2AC
RPS15A	NSA2
HIST1H2AM	HIST1H2BO
HIST1H2BK	HIST2H2AC
COX6B1	COX6A1
RPS13	MRPS7
HIST1H2AM	HIST1H2BB
HIST1H2AM	HIST1H2BK
RPS15	NSA2
RPS28	MRPS7
RPS15	RPL41
RPS13	RPL41
RPS28	RPL41
RPS4Y1	MRPS7
RPS15	EEF2
IFITM2	IFITM3
NSA2	RPS4Y1
TXN	SOD1
HIST3H3	HIST2H2AC
NSA2	RPS5
RPL26	MRPS7
EEF2	RPL26
RPL41	RPS5
RPS13	EEF2
UBE2C	PLK1
DHCR24	DHCR7
NSA2	MRPS7
HIST1H2BB	HIST1H2BK
HIST3H3	HIST1H2BO
RPL41	RPS29
HIST3H3	HIST1H2BB
HIST3H3	HIST1H2BK
RPS29	EEF2
COX8A	COX6B1
EEF2	RPS4Y1
TXN	PRDX5
ATP5H	COX6A1
HIST3H3	HIST1H2AB
EEF2	MRPS7
RPS28	PABPC1
COX8A	COX6A1
RPS13	NSA2
FN1	THBS1
RPL41	RPL24
RPS28	NSA2
RPL41	RPL26
RPL24	EEF2
RPL41	RPS15A
COX7B	COX6A1
IFITM3	IFI6
UQCR10	COX6A1
ICT1	MRPS7
COX7B	COX6B1
COX7B	COX8A
IFITM2	IFI6
RPS28	EEF2
B2M	MT2A
RPL24	NSA2
HIST3H3	XRCC6
PLK1	PSMB3
HIST1H1C	HIST1H1E
GATAD2B	HIST2H2AC
HIST1H2BK	HIST1H2BO
RPL24	MRPS7
POLR2L	SUPT4H1
HIST1H2AB	HIST1H3B
RPS13	PABPC1
SDC4	THBS1
HIST1H2BB	HIST1H3B
PABPC1	RPS4Y1
PABPC1	RPS5
HIST1H2AM	HIST1H3B
POLR2K	SUPT4H1
HIST2H2AC	PLK1
SDC4	FN1
HIST1H2BK	HIST1H3B
HIST1H2BO	HIST1H3B
ACTG1	MYL12A
TXN	APEX1
POLR2L	PHF5A
RPL24	PABPC1
RPL41	EEF2
UBE2C	UBE2Q1
RPS15	PABPC1
PABPC1	RPL26
RPS15A	PABPC1
HIST2H2AC	HIST1H3B
THBS1	SRGN
XRCC6	HIST1H2BB
FN1	SRGN
XRCC6	HIST1H2BO
XRCC6	HIST1H2BK
OAZ1	PSMB3
POLR2K	PHF5A
HIST1H2BB	PLK1
ANXA6	ANXA2
HIST3H3	PLK1
HIST1H2BB	POLR2L
RPS29	PABPC1
UBE2C	HIST2H2AC
RPL41	PABPC1
HIST1H2BK	POLR2L
HIST1H2BK	PLK1
HIST1H2BO	PLK1
POLR2L	HIST1H2BO
RPS29	NSA2
HIST1H2BB	POLR2K
UBE2C	PSMB3
HIST1H2BB	UBE2C
UBE2C	HIST1H2BO
HIST1H2BK	UBE2C
POLR2K	HIST1H2BO
HIST1H2BK	POLR2K
GATAD2B	HIST1H2BK
GATAD2B	HIST1H2BO
RPL41	RPS4Y1
HIST3H3	HIST1H3B
POLR2K	HIST2H2AC
HIST2H2AC	POLR2L
GATAD2B	HIST1H2BB
ATP5H	COX6B1
NSA2	RPL26
HIST3H3	HIST1H2AM
CKS2	KPNA2
ANXA2	LGALS1
CKS2	UBE2C
PABPC1	EEF2
HIST1H2BK	HIST1H1C
COX7B	UQCR10
EEF2	ENO1
SOD1	PRDX5
DUSP23	PLK1
DUSP23	PLK2
TXN	EEF2
TALDO1	ENO1
UQCR10	COX8A
TXN	ENO1
UBE2C	TK1
NOP10	POLR2L
ATP5H	SOD1
KPNA2	PLK1
NDUFS5	ATP5H
POLR2K	NOP10
UBE2C	RNASEH2A
TXN	TALDO1
NDUFA1	COX6B1
UBE2C	KPNA2
ANXA2	ENO1
UQCR10	COX6B1
TXN	CCL2
LDLR	CCL2
SOD1	ENO1
ENO1	PHF5A
EEF2	QARS
NDUFS5	SOD1
XRCC6	APEX1
RPL24	ATP5H
RPS28	COX6A1
CKS2	PLK1
FTL	PSENEN
NDUFA1	ATP5H
HIST1H1C	HIST2H2AC
TGFBI	FN1
EMP3	LGALS1
UQCR10	ATP5H
DPM1	CHMP5
KPNA2	PLK2
COX7B	NDUFA1
ACTG1	ENO1
NDUFS5	COX6B1
TXN	NQO1
ACTG1	HIST1H3B
HIST1H1C	HIST1H2BO
XRCC6	EEF2
RPL24	NDUFS5
KPNA2	TK1
RPS13	COX6A1
NDUFA1	COX8A
RPS13	ANXA2
CCL2	LGALS1
TXN	ACTG1
RPS13	NOP10
XRCC6	ENO1
TXN	NDUFA1
NDUFA1	COX6A1
ATP5H	ICT1
QARS	ENO1
HIST1H2AM	HIST1H1C
SOD1	LGALS1
SLC7A5	SLC38A2
ACTG1	EEF2
NDUFS5	RPL26
NDUFA1	UQCR10
NDUFA1	SOD1
EMP3	PHF5A
TK1	RNASEH2A
ANXA2	AXL
PDLIM1	DHCR7
FN1	MT2A
TK1	PLK1
QARS	RPS5
NDUFS5	COX6A1
HIST2H2AC	HIST1H1E
POLR2L	ENO1
XRCC6	HIST2H2AC
HIST3H3	ACTG1
HIST1H2AM	HIST1H1E
RPS15	ICT1
XRCC6	HIST1H3B
RPS13	QARS
FN1	ACTG1
ACAT2	DHCR7
NDUFA1	RPL26
APEX1	RPS5
HIST1H1E	HIST1H3B
COX8A	ATP5H
TALDO1	LGALS1
THBS1	CCL2
ACTG1	PLK1
RPS15	ENO1
PLK1	PLK2
ATP6V0E1	ATP5H
SFN	PABPC1
NQO1	SOD1
TXN	ATP5H
RPL24	NDUFA1
EIF4G2	PABPC1
HIST1H2BB	ACTG1
ACAT2	PABPC1
PSAP	RNASEH2A
HIST1H2BK	ACTG1
ACTG1	HIST1H2BO
EEF2	PHF5A
PLK1	RNASEH2A
NQO1	PABPC1
ACTG1	PLK2
DHCR24	ENO1
RPS13	ENO1
COX7B	NDUFS5
HIST1H1C	HIST1H3B
NQO1	PRDX5
NDUFS5	UQCR10
CKS2	PLK2
